# Supplementary material for: Biostatistics and Data Analysis Using R: A Tailored Training Approach for Medical Students
Source: Research Square preprint supplement (doi:10.21203/rs.3.rs-6453160/v1), 2025-06-30
Supplement: Supplementary file 1 [file f72e2d97328b05beadc6695b.docx]

Biostatistics and Data Analysis Using R: A Tailored Training Approach for Medical Students

Monika Hebeisen1*, Stefanie von Felten1***†*** and Ulrike Held1***†***

1*Epidemiology, Biostatistics and Prevention Institute, Department of Biostatistics, University of Zurich, Hirschengraben 84, 8001, Zurich, Switzerland.

# Appendix A.1. Questions of end-of-course snapshot survey

All participants of the short R courses were asked the following questions.

“(1) The course description accurately reflected the content of the course ”,

“(2) The content of the course is relevant for my research practice ”,

“(3) I would participate in the course again ”,

“(4) The proportion of practicals is high enough ”,

“(5) The lecturers demonstrated knowledge of lecture materials ”,

“(6) The lecturers were prepared for class ”,

“(7) The lecturers are enthusiastic in talking about the topic ”,

“(8) The lecturers stimulated interest in the topic ”,

“(9) Please rate your overall satisfaction with this course (grade 1 to 6, plus eventual comments) ”,

“Which statistical programming language were you using before the course?”,

“Would you consider using R in your next research project?”,

“Do you have any final/specific comments?”,

“What is your level of education and institution? (e g 4 Jahr Humanmedizin UZH)”, “How did you get to know of this course?”.

Answer options for the first eight questions were on a numerical rating scale from 1 meaning ”Strongly disagree” to 5 meaning ”Strongly agree”. The ninth question should be answered according to the Swiss school grading system from 1 ”very weak” to 6 ”very good”. The following questions were asked in freetext mode.

Depending on the format of the respective course, two additional questions were asked after question number 8, with the same numerical grading from 1 to 5 as for the first eight questions.

For on-site courses the two questions were:

“I felt safe during the course with the measures taken due to the coronavirus”, “I would have preferred to do the course in online format”.

For online courses the following two questions were asked:

“I felt left alone with my technical and understanding problems due to the online format of the course ”,

“I would have preferred to do the course on-site ”.

A.2. Processes around long-term evaluation

In the survey invitation of the long-term evaluation, we declared that we are conducting the survey due to our interest in the long-term success of the short R courses, in particular with regard to usage of R for data analysis after the course. The participants of each course received an invitation to a course-specific, but identical survey, accessible via specific URL. This procedure allowed us to know which course the respondents had taken without the need to ask for this information. A first reminder e-mail with the original text was sent after one week. A second reminder e-mail with a slightly modified text was sent after two weeks. In the second reminder we pointed out that we were interested in all responses, also from participants who had not done any analysis or used R since attending the course, to also encourage responses from course participants who had not performed data analysis using R after the course.

**A.3. Questions of long-term evaluation survey**

Current position and data analysis

| 1 Please specify your current position in the medical field *  Choose one of the following answers  Please choose **only one** of the following:  Medical student year 1-3  Medical student year 4  Medical student year 5  Medical student year 6  PhD student  Resident physician (Assistenzarzt)  Senior physician (Oberarzt)  Other |
| --- |
| 2 Since completing the above-mentioned course, have you conducted data analysis using any software? Data analysis includes any steps such as data preparation, descriptive tables, graphics, statistical tests, statistical models. *  Choose one of the following answers  Please choose **only one** of the following:  Yes  No |

Kind of data analysis and R usage

| 3 In what context did you perform a data analysis after participation in the course? *  Only answer this question if the following conditions are met:  Answer was 'Yes' at question ' [G01Q02]' (Since completing the above-mentioned course, have you conducted data analysis using any software?Data analysis includes any steps such as data preparation, descriptive tables, graphics, statistical tests, statistical models. )  Select all that apply  Please choose **all** that apply:  Data analysis for master thesis  Data analysis for dissertation  Data analyses for a medical research publication  Other analyses for medical research  Other: |
| --- |
| 4 Did you use R software for any of the data analyses? *  Only answer this question if the following conditions are met:  Answer was 'Yes' at question ' [G01Q02]' (Since completing the above-mentioned course, have you conducted data analysis using any software?Data analysis includes any steps such as data preparation, descriptive tables, graphics, statistical tests, statistical models. )  Choose one of the following answers  Please choose **only one** of the following:  Yes  No |

More details on R usage

| 5 Which parts of the data analysis did you do in R? *  Only answer this question if the following conditions are met:  Answer was 'Yes' at question ' [G01Q02]' (Since completing the above-mentioned course, have you conducted data analysis using any software?Data analysis includes any steps such as data preparation, descriptive tables, graphics, statistical tests, statistical models. ) *and* Answer was 'Yes' at question ' [G02Q04]' (Did you use R software for any of the data analyses?)  Select all that apply  Please choose **all** that apply:  Data preparation  Descriptive tables  Graphics  Statistical tests  Statistical models  Other: |
| --- |

| 6 Why did you use R for these analysis steps and not another software? *  Only answer this question if the following conditions are met:  Answer was 'Yes' at question ' [G01Q02]' (Since completing the above-mentioned course, have you conducted data analysis using any software?Data analysis includes any steps such as data preparation, descriptive tables, graphics, statistical tests, statistical models. ) *and* Answer was 'Yes' at question ' [G02Q04]' (Did you use R software for any of the data analyses?)  Select all that apply  Please choose **all** that apply:  R course participation  Easier to use  Faster  More confident that result is correct  Publication quality graphics and tables  More reproducible  Necessary to show code in publication  R is recommended software for this type of analysis  R is taught in Bachelor/Master in Medicine (Praktikum Biostatistik/  Klinische Biostatistik)  Only with R this complex analysis could have been done  R is free and open source  Extensive availability of useful add-on packages for R  Other: |
| --- |

| 7 Did the course enable you to perform a data analysis on your own using R? *  Only answer this question if the following conditions are met:  Answer was 'Yes' at question ' [G01Q02]' (Since completing the above-mentioned course, have you conducted data analysis using any software?Data analysis includes any steps such as data preparation, descriptive tables, graphics, statistical tests, statistical models. ) *and* Answer was 'Yes' at question ' [G02Q04]' (Did you use R software for any of the data analyses?)  Please choose the appropriate response for each item:   |  | **1**  **(not at all)** | **2** | **3** | **4** | **5** | **6**  **(completely)** | | --- | --- | --- | --- | --- | --- | --- | |  |  |  |  |  |  |  | |
| --- | --- | --- | --- | --- | --- | --- | --- | --- | --- | --- | --- | --- | --- | --- |

| 8 Was the information provided in the course sufficient to perform the data analysis with R? *  Only answer this question if the following conditions are met:  Answer was 'Yes' at question ' [G01Q02]' (Since completing the above-mentioned course, have you conducted data analysis using any software?Data analysis includes any steps such as data preparation, descriptive tables, graphics, statistical tests, statistical models. ) *and* Answer was 'Yes' at question ' [G02Q04]' (Did you use R software for any of the data analyses?)  Please choose the appropriate response for each item:   |  | **1 (not sufficien at all, I had to**  **consult many other sources)** | **2** | **3** | **4** | **5** | **6 (sufficient, I needed no**  **additional information)** | | --- | --- | --- | --- | --- | --- | --- | |  |  |  |  |  |  |  | |
| --- | --- | --- | --- | --- | --- | --- | --- | --- | --- | --- | --- | --- | --- | --- |

| 9 What other resources did you use in addition to the knowledge from the course? *  Only answer this question if the following conditions are met:  Answer was 'Yes' at question ' [G01Q02]' (Since completing the above-mentioned course, have you conducted data analysis using any software?Data analysis includes any steps such as data preparation, descriptive tables, graphics, statistical tests, statistical models. ) *and* Answer was 'Yes' at question ' [G02Q04]' (Did you use R software for any of the data analyses?)  Select all that apply  Please choose **all** that apply:  No additional resources  R-internal help files  Google (or other search engine)  Help from my supervisor/superior  Help from my peers/colleagues  Online tutorials  R Code Clinic offered by Monika Hebeisen (EBPI)  Other online R courses  Other in-person R courses (please specify in "Sonstige"/"Others")  Materials I had from the lecture "Praktische Biostatistik" (1st year Bachelor)  Materials I had from the lecture "Klinische Biostatistik" (1st year Master)  ChatGPT (or other AI chatbot)  Other: |
| --- |
| 10 Did you use Dynamic Reporting (with RMarkdown, Quarto, LaTeX with knitr or Sweave) for any of your data analyses? *  Only answer this question if the following conditions are met:  Answer was 'Yes' at question ' [G01Q02]' (Since completing the above-mentioned course, have you conducted data analysis using any software?Data analysis includes any steps such as data preparation, descriptive tables, graphics, statistical tests, statistical models. ) *and* Answer was 'Yes' at question ' [G02Q04]' (Did you use R software for any of the data analyses?)  Choose one of the following answers  Please choose **only one** of the following:  No  I tried it, but did not use it  Yes |

Dynamic reporting

| 11 Which Dynamic Reporting software did you use/try? *  Only answer this question if the following conditions are met:  Answer was 'Yes' at question ' [G01Q02]' (Since completing the above-mentioned course, have you conducted data analysis using any software?Data analysis includes any steps such as data preparation, descriptive tables, graphics, statistical tests, statistical models. ) *and* Answer was 'Yes' at question ' [G02Q04]' (Did you use R software for any of the data analyses?) *and* Answer was NOT 'No' at question ' [G03Q17]' (Did you use Dynamic Reporting (with RMarkdown, Quarto, LaTeX with knitr or Sweave) for any of your data analyses?)  Select all that apply  Please choose **all** that apply:  RMarkdown (Rmd files)  Quarto (qmd files)  LaTeX with knitr or Sweave (Rnw files)  Other: |
| --- |

Usage of other software for data analysis

| 12 What other software did you use for data analysis? *  Only answer this question if the following conditions are met:  Answer was 'Yes' at question ' [G01Q02]' (Since completing the above-mentioned course, have you conducted data analysis using any software?Data analysis includes any steps such as data preparation, descriptive tables, graphics, statistical tests, statistical models. ) *and* Answer was 'No' at question ' [G02Q04]' (Did you use R software for any of the data analyses?)  Select all that apply  Please choose **all** that apply:  Excel  SPSS  Stata  Graph Pad Prism  SAS  Python  Matlab  Other: |
| --- |

| 13 What were the reasons for using another software? *  Only answer this question if the following conditions are met:  Answer was 'Yes' at question ' [G01Q02]' (Since completing the above-mentioned course, have you conducted data analysis using any software?Data analysis includes any steps such as data preparation, descriptive tables, graphics, statistical tests, statistical models. ) *and* Answer was 'No' at question ' [G02Q04]' (Did you use R software for any of the data analyses?)  Select all that apply  Please choose **all** that apply:  Recommended by supervisor/superior  Recommended by peers/colleagues  Received support from peers/colleagues  Knew already how to do analysis with the other software  Tried with R, but was not successful  Technical problems to run R on hospital laptop/PC  Did not know enough to do analysis with R  Did not know how to start with R  Did not have time to look for info about specific tasks in R  Did not know how to do.... (please specify in "other")  Other: |
| --- |
| 14 What would have helped you to use R instead? *  Only answer this question if the following conditions are met:  Answer was 'Yes' at question ' [G01Q02]' (Since completing the above-mentioned course, have you conducted data analysis using any software?Data analysis includes any steps such as data preparation, descriptive tables, graphics, statistical tests, statistical models. ) *and* Answer was 'No' at question ' [G02Q04]' (Did you use R software for any of the data analyses?)  Select all that apply  Please choose **all** that apply:  Longer course  Course about my specific topic (please specify in "Sonstige"/"Others")  More support from my research team  More individual support from course teacher during course  Other: |

No data analysis

| 15 Have you used the R software after participation in the above-mentioned course? *  Only answer this question if the following conditions are met:  Answer was 'No' at question ' [G01Q02]' (Since completing the above-mentioned course, have you conducted data analysis using any software?Data analysis includes any steps such as data preparation, descriptive tables, graphics, statistical tests, statistical models.)  Choose one of the following answers  Please choose **only one** of the following:  Yes  No |
| --- |

R usage if not for data analysis

16 What did you use R for, if not for data analysis? *

Only answer this question if the following conditions are met:

Answer was 'No'

at question

' [G01Q02]' (Since completing the above-mentioned course,

have you conducted data analysis using any software?Data analysis includes any steps

such as data preparation, descriptive tables, graphics, statistical tests, statistical models.

)

*and*

Answer was 'Yes'

at question

' [G08Q16]' (Have you used the R software after

participation in the above-mentioned course?)

Please write your answer here:

Final comments

17

Do you have any additional comments?

Please write your answer here:

Thank you very much for your participation! Your input is very valuable for us!

# A.4. Text of invitation email to long-term evaluation

Dear participant of the course “Data Analysis for Medical Research using R” no *<*number*>* on *<*date*>*,

We are interested in the long-term success of our R courses and therefore would like to ask you some questions about your usage of R for data analysis after the course. Your participation will be very much appreciated!

Completing our short survey will take less than 10 minutes. You can participate via this link: *<*link*>*

Please note that the survey is anonymous and your participation is voluntary. By completing the survey you consent to further use of the generated data and presentation of the data in aggregated form. No personal data will be saved or linked with the survey data.

Thank you very much for your valuable feedback.

Monika Hebeisen, Stefanie von Felten & Ulrike Held

# A.5. Text of reminder email to long-term evaluation

Dear participant of the course “Data Analysis for Medical Research using R” no *<*number*>* on *<*date*>*,

We invited you to participate in our survey to evaluate the long-term success of our R courses. We are excited about the responses we already received. However, due to the anonymous nature of our survey, we do not know if your response is included.

If you have not yet completed our survey, we would very much appreciate if you could complete it within the next two weeks.

We are interested in all responses, even if you have not done any analysis or used R since you attended the course. Completing our short survey will take less than 10 minutes. You can participate via this link: *<*link*>*

Please note that the survey is anonymous and your participation is voluntary. By completing the survey you consent to further use of the generated data and presentation of the data in aggregated form. No personal data will be saved or linked with the survey data.

Thank you very much for your valuable feedback.

Monika Hebeisen, Stefanie von Felten & Ulrike Held
